# Supplementary material for: Pharmacological Management of Lewy Body Dementia: A Systematic Review and Meta-Analysis
Source: Atypon-hosted journal article supplement (doi:10.1176/appi.ajp.2015.14121582), 2015-06-18

**FIGURE S1. PRISMA flow chart for study selection**

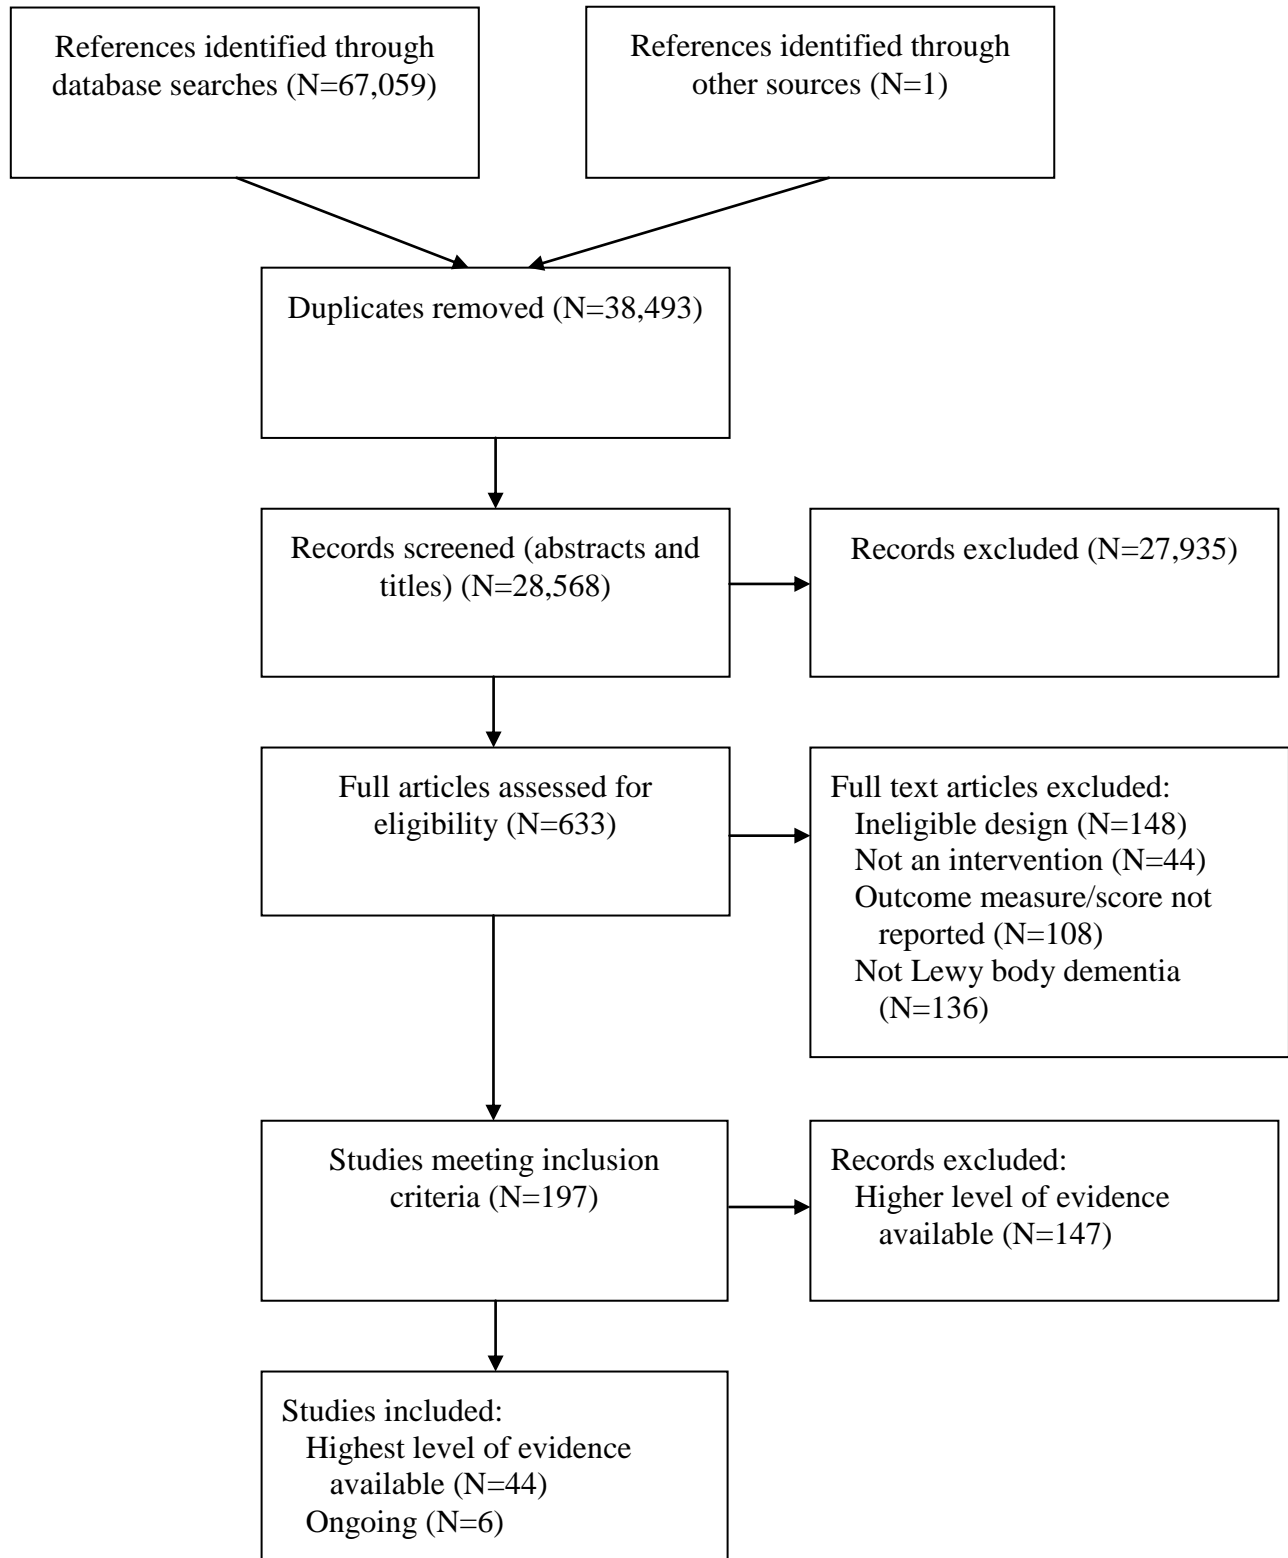

**TABLE S1. Characteristics of included studies**

| Reference           | Study quality <sup>a</sup> | Level of evidence <sup>b</sup> | Participants                                            |                                                   | Study length | Study dose        | Outcome measures <sup>c</sup>                                                                                     |
|---------------------|----------------------------|--------------------------------|---------------------------------------------------------|---------------------------------------------------|--------------|-------------------|-------------------------------------------------------------------------------------------------------------------|
|                     |                            |                                | Diagnosis                                               | Numbers                                           |              |                   |                                                                                                                   |
| <b>Donepezil</b>    |                            |                                |                                                         |                                                   |              |                   |                                                                                                                   |
| Aarsland (16)       | Strong                     | 2                              | PD and cognitive impairment                             | 14                                                | 5 months     | 10mg              | Primary: CIBIC+, MMSE, UPDRS-III<br>Secondary: NPI, unspecified neuropsychological tests                          |
| Dubois (17)         | Strong                     | 2                              | PDD                                                     | 173 (placebo)<br>195 (5mg)<br>182 (10mg)          | 6 months     | 5mg or 10mg       | Primary: ADAS-cog, CIBIC+<br>Secondary: BTA, CGI-PD, DAD, D-KEFS-VFT, MMSE, NPI, SE, UPDRS                        |
| Ikeda (20)          | Strong                     | 2                              | DLB                                                     | 46 (placebo)<br>47 (5mg)<br>49 (10mg)             | 12 weeks     | 5mg or 10mg       | Primary: MMSE, NPI-2<br>Secondary: NPI-10, UPDRS-III, ZBI                                                         |
| Leroi (18)          | Moderate                   | 2                              | PD and dementia or cognitive impairment secondary to PD | 16                                                | 18 weeks     | 10mg              | BTA, CSDD, MDRS, DTVM, H&Y, HVL-T-R, MMSE, NART, NPI, TMT-A, TMT-B, UPDRS-ADL, UPDRS-IV, UPDRS-III, UPDRS-IV, VFT |
| Mori (15)           | Strong                     | 2                              | DLB                                                     | 35 (placebo)<br>35 (3mg)<br>33 (5mg)<br>37 (10mg) | 3 months     | 3mg, 5mg, or 10mg | CIBIC+, MMSE, NPI-2, NPI-4, NPI-10, WMS-R-A/C, UPDRS-III, VFT, VPTA-FD, VPTA-OFI, WAIS-DS, ZBI                    |
| Ravina (19)         | Strong                     | 2                              | PDD                                                     | 22                                                | 10 weeks     | 10mg              | Primary: ADAScog<br>Secondary: BPRS, CGI-C, MDRS, MMSE, UPDRS-III                                                 |
| Satoh (23)          | Moderate                   | 3                              | DLB, visual hallucinations                              | 13                                                | 3 months     | 5mg               | BEHAVE-AD-H, MMSE                                                                                                 |
| Minett (24)         | Moderate                   | 3                              | DLB or PDD                                              | 9 (DLB)<br>15 (PDD)                               | 26 weeks     | N/A               | MMSE, NPI, UPDRS                                                                                                  |
| <b>Rivastigmine</b> |                            |                                |                                                         |                                                   |              |                   |                                                                                                                   |
| Emre (22)           | Strong                     | 2                              | PDD                                                     | 179 (placebo)<br>362                              | 6 months     | 12mg              | Primary: ADCS-CGI-C, ADAScog<br>Secondary: 10-                                                                    |

|                    |          |   |            |                                  |          |      |                                                                                                                                                                                      |
|--------------------|----------|---|------------|----------------------------------|----------|------|--------------------------------------------------------------------------------------------------------------------------------------------------------------------------------------|
|                    |          |   |            | (treatment )                     |          |      | point, ADCS-ADL, CDRCAS-PoA, D-KEFS-VFT, MMSE, UPDRS-III                                                                                                                             |
| McKeith (21)       | Strong   | 2 | DLB        | 61 (placebo)<br>59 (treatment )  | 5 months | 12mg | Primary: CDRCAS (speed of response), NPI<br>Secondary: ADCS-CGI-C, BDT, COWART, DSST, MMSE, NPI, Stroop, TMT-A, TMT-B, UPDRS                                                         |
| <b>Galantamine</b> |          |   |            |                                  |          |      |                                                                                                                                                                                      |
| Edwards (25)       | Moderate | 3 | DLB        | 50                               | 6 months | 24mg | Primary: ADCS-CGI-C, CDRCAS, NPI<br>Secondary: 1-day, ADAScog, ADCS-ADL, CAF, MMSE, PSQI                                                                                             |
| Litvinenko (26)    | Moderate | 3 | PDD        | 20 (control)<br>21 (treatment )  | 6 months | 16mg | 10-point, ADAScog, DAD, FAB, MMSE, NPI, UPDRS-III,                                                                                                                                   |
| <b>Memantine</b>   |          |   |            |                                  |          |      |                                                                                                                                                                                      |
| Aarsland (29)      | Moderate | 2 | DLB or PDD | 35 (placebo)<br>40 (treatment )  | 6 months | 20mg | Primary: CGI-C<br>Secondary outcome measures: MMSE, NPI, AQT, UPDRS-III                                                                                                              |
| Emre (27)          | Strong   | 2 | DLB or PDD | 101 (placebo)<br>98 (treatment ) | 6 months | 20mg | 10-point, ACT, ADAScog-ot, ADCS-ADL23, BNT, BFRT, BJLO, CASST, CFT, COWAT, CS-SRT, CS-CRT, DOT, NPI, SIT-C, SIT-I, TMT-A, TMT-B, UPDRS-III, VEPAL, VRRT-DR, VRRT-IR, VRRT-recog, ZBI |
| Leroi (28)         | Moderate | 2 | PDD        | 14 (placebo)<br>11               | 4 months | 20mg | Primary: MDRS<br>Secondary: CIBIC+ MMSE,                                                                                                                                             |

|                      |               |   |                                                | (treatment )                    |                                                  |                    | NPI, UPDRS-III                                                                                                                                                 |
|----------------------|---------------|---|------------------------------------------------|---------------------------------|--------------------------------------------------|--------------------|----------------------------------------------------------------------------------------------------------------------------------------------------------------|
| <b>(Ar)modafinil</b> |               |   |                                                |                                 |                                                  |                    |                                                                                                                                                                |
| Boeve (30)           | Moderate      | 3 | DLB                                            | 20                              | 12 weeks                                         | 150 - 250mg        | Primary: ADAScog, ADCS-CGI-C, ESS, MWT<br>Secondary: MMSE, NPI, unspecified measure of ADL, neuropsychological tests (unspecified), unspecified measure of QoL |
| Varanese (31)        | Study 1: Weak | 4 | Study 1: DLB or PDD<br><br>Study 2: DLB or PDD | Study 1: 6                      | Study 1: 18 - 66 weeks<br><br>Study 2:           | Study 1: 150-400mg | Study 1: CGI-S                                                                                                                                                 |
|                      | Study 2: Weak | 3 |                                                | Study 2: 9                      |                                                  | Study 2: 150mg     | Study 2: DT, PVT, VAS - alertness                                                                                                                              |
| <b>Piracetam</b>     |               |   |                                                |                                 |                                                  |                    |                                                                                                                                                                |
| Sano (32)            | Weak          | 2 | PDD or PD and cognitive impairment             | 10 (placebo)<br>10 (treatment ) | 6 months                                         | 4.8mg              | CATEG, COWAT, CPT, global rating of neuropsychological performance, mMMSE, RT, SRT, SIP, UPDRS, WAIS-DS                                                        |
| <b>Levodopa</b>      |               |   |                                                |                                 |                                                  |                    |                                                                                                                                                                |
| Bonelli (33)         | Weak          | 3 | DLB, PDD, or PD                                | 20 (DLB)<br>20 (PDD)<br>20 (PD) | Acute test: 1 hour<br>Chronic test: not reported | 200mg              | H&Y, MMSE, UPDRS                                                                                                                                               |
| Goldman (34)         | Moderate      | 3 | DLB                                            | 19                              | 3 months (mean)                                  | 368mg (mean)       | H&Y, UPDRS-Thought, UPDRS-III                                                                                                                                  |
| Molloy (36)          | Weak          | 3 | DLB, PDD, or PD                                | 27 (DLB)<br>33 (PDD)<br>31 (PD) | Acute test: 2 hours,<br>Chronic test: 6 months   | 323 mg (mean)      | FT, MMSE, UPDRS-III, WT                                                                                                                                        |

|                   |          |   |                                    |                                |                                                         |                                                   |                                                                                                                                                                    |
|-------------------|----------|---|------------------------------------|--------------------------------|---------------------------------------------------------|---------------------------------------------------|--------------------------------------------------------------------------------------------------------------------------------------------------------------------|
| Onofrj (35)       | Moderate | 3 | DLB, PD, or ET                     | 24 (DLB)<br>27 (PD)<br>34 (ET) | 90 – 110 minutes                                        | 300mg (mean)                                      | Electromyography, FAB, H&Y, MDRS-2, MMSE, NPI, unspecified measure of REM sleep behaviour disorder, TRGRS, UPDRS-III, unspecified measure of visual hallucinations |
| Tse (37)          | Moderate | 2 | PDD                                | 5 (control)<br>6 (withdrawal)  | 32 days                                                 | N/A                                               | Checklist of motoric and behavioural/mental dysfunction, H&Y, MMSE, NABDF, UPDRS-III                                                                               |
| <b>Amantadine</b> |          |   |                                    |                                |                                                         |                                                   |                                                                                                                                                                    |
| Yablonskaya (38)  | Weak     |   | PDD or PD and cognitive impairment | 10 (PDD)<br>15 (PD and cog)    | 6 months                                                | 200mg                                             | FAB, H&Y, MDRS, MMSE, UDPRS                                                                                                                                        |
| <b>Rotigotine</b> |          |   |                                    |                                |                                                         |                                                   |                                                                                                                                                                    |
| Fanciulli (40)    | Weak     | 4 | PDD                                | 2                              | 3 months                                                | 4mg                                               | HARS, MMSE, RO-DR, RO-IR, RO-P, UPDRS-III, WCST                                                                                                                    |
| Strothjohann (39) | Moderate | 3 | PDD                                | 9                              | Not reported                                            | 8mg                                               | UPDRS                                                                                                                                                              |
| <b>Selegiline</b> |          |   |                                    |                                |                                                         |                                                   |                                                                                                                                                                    |
| Portin (41)       | Weak     | 3 | PDD or PD                          | 4 (PDD)<br>3 (PD)              | 1 month                                                 | 5mg                                               | BWVT, CM-DR-M, CM-DR-M, Kim, MST, WAIS-DR, VST, clinical interview and observations of emotional change                                                            |
| <b>Clozapine</b>  |          |   |                                    |                                |                                                         |                                                   |                                                                                                                                                                    |
| Lee (42)          | Moderate | 4 | PDD or dementia                    | 8 (PDD)<br>8 (dementia)        | PDD = 1 month (mean)<br>Other dementia = 36 days (mean) | PDD = 41mg (mean)<br>Other dementia = 48mg (mean) | Primary: CGI-S<br>Secondary: BARS, CMAI-SF, MMSE                                                                                                                   |

| Olanzapine     |          |   |                           |                                                       |                |                                |                                                                                                                               |
|----------------|----------|---|---------------------------|-------------------------------------------------------|----------------|--------------------------------|-------------------------------------------------------------------------------------------------------------------------------|
| Cummings (43)  | Moderate | 2 | DLB                       | 10 (placebo)<br>5 (5mg)<br>7 (10mg)<br>7 (15mg)       | 6 weeks        | 5, 10 or 15mg/day              | BPRS, NPI-NH                                                                                                                  |
| Moretti (44)   | Moderate | 3 | DLB, PDD, AD, FLD, or VaD | 4 (DLB)<br>3 (PDD)<br>34 (AD)<br>17 (FLD)<br>10 (VaD) | 6 months       | 10mg                           | BEHAVE-AD; CIRS; CSDD; Katz-ADL; IADL; MMSE; NPI; RSS; 10-point; TPT; visuospatial test (unspecified); WAIS-R-WFs; WAIS-R-WFp |
| Quetiapine     |          |   |                           |                                                       |                |                                |                                                                                                                               |
| Kurlan (49)    | Strong   | 2 | DLB, PDD, or AD           | 20 (placebo)<br>20 (treatment)                        | 10 weeks       | 300mg                          | Primary: BPRS<br>Secondary: ADCS-ADL, ADCS-CGI-C, MMSE, NPI, RMDSD, UPDRS                                                     |
| Prohorov (48)  | Moderate | 4 | PDD or PD                 | 20 (PDD)<br>19 (PD)                                   | 10 months      | Up to 600mg                    | MMSE, UPDRS-III                                                                                                               |
| Takahashi (47) | Weak     | 4 | DLB                       | 9                                                     | 2 months       | According to clinical response | MMSE, NPI, SAS                                                                                                                |
| Risperidone    |          |   |                           |                                                       |                |                                |                                                                                                                               |
| Culo (51)      | Moderate | 2 | DLB, AD                   | 17 (DLB)<br>Not reported (AD)                         | 3 months       | 0.5mg                          | CGI-C, E-BEHAVE-AD, MMSE, NPI-NH, SIB, UKU                                                                                    |
| Workman (50)   | Weak     | 3 | PDD                       | 9                                                     | 37 days (mean) | 1.9mg/day (mean)               | BPRS, CMAI, HRS-D, MMSE, RSSE                                                                                                 |
| Citalopram     |          |   |                           |                                                       |                |                                |                                                                                                                               |
| Culo (51)      | Moderate | 2 | DLB, AD                   | 14 (DLB)<br>Not reported (AD)                         | 3 months       | 10mg                           | CGI-C, E-BEHAVE-AD, MMSE, NPI-NH, SIB, UKU                                                                                    |
| Duloxetine     |          |   |                           |                                                       |                |                                |                                                                                                                               |
| Vasile (52)    | Weak     | 3 | PDD                       | 8 (duloxetine)                                        | 6 months       | 45mg                           | CGII, HRS-D, , MADRS, MMSE                                                                                                    |
| Clonazepam     |          |   |                           |                                                       |                |                                |                                                                                                                               |
| Massironi (53) | Weak     | 4 | DLB                       | 3                                                     | 1 month        | 0.3 – 0.5mg                    | Number of nights with RBD episode                                                                                             |
| Ramelteon      |          |   |                           |                                                       |                |                                |                                                                                                                               |
| Kasanuki (54)  | Weak     | 4 | DLB                       | 4                                                     | 2 months       | 8mg                            | Primary: ESS, NPI, PSQI<br>Secondary: Barthel, MMSE, UPDRS-III, ZBI                                                           |
| Gabapentin     |          |   |                           |                                                       |                |                                |                                                                                                                               |
| Fujishiro (55) | Weak     | 4 | DLB                       | 1                                                     | 3 months       | 300mg                          | IRLSS, MMSE, UPDRS                                                                                                            |
| Hawkins (56)   | Weak     | 4 | PDD, AD, mixed            | 1 (PDD)<br>8 (AD)                                     |                | 1800mg                         | CGIS                                                                                                                          |

|                   |      |   |                                                   |                                                                   |             |        |                                                                        |
|-------------------|------|---|---------------------------------------------------|-------------------------------------------------------------------|-------------|--------|------------------------------------------------------------------------|
|                   |      |   | dementia,<br>VaD, TBI,<br>ABD,<br>dementia<br>NOS | 7 (mixed)<br>3 (VaD)<br>3 (TBI)<br>1 (ABD)<br>1 (dementia<br>NOS) |             |        |                                                                        |
| <b>Zonisamide</b> |      |   |                                                   |                                                                   |             |        |                                                                        |
| Odawara<br>(57)   | Weak | 4 | DLB                                               | 3                                                                 | 3<br>months | 25mg   | Barthel, GDS, IADL,<br>MMSE, NPI,<br>UPDRS-III, ZBI<br>MMSE, UPDRS-III |
| Tombini<br>(58)   | Weak | 4 | PDD                                               | 1                                                                 | 1 year      | 200mg  |                                                                        |
| <b>Yokukansan</b> |      |   |                                                   |                                                                   |             |        |                                                                        |
| Kawanabe<br>(60)  | Weak | 3 | PDD or PD                                         | 7 (PDD)<br>7 (PD)                                                 | 2<br>months | 7.5mg  | Barthel, MMSE,<br>NPI, UPDRS-III<br>Barthel, IADL,<br>MMSE, NPI        |
| Mizukami<br>(59)  | Weak | 2 | DLB, AD, or<br>mixed<br>dementia                  | 15 (DLB)<br>78 (AD)<br>13 (mixed)                                 | 8 weeks     | 22.5mg |                                                                        |

<sup>a</sup> Study quality based on the Quality Assessment Tool for Quantitative Studies Study quality based on the Quality Assessment Tool for Quantitative Studies

<sup>b</sup> Based on Oxford Centre for Evidence-Based Medicine: 1 = systematic review of RCTs or N-of-1 trials, 2 = RCT or observational study with dramatic effect, 3 = non-randomised controlled trial or follow up study, 4 = case series or case control

<sup>c</sup> 1-day = One-day fluctuation Scale; 10-point = Ten-Point Clock Drawing Task; ABD = anorexic brain damage; ACT = Alternating Categories Test; ADCS-ADL = Alzheimer's Disease Cooperative Study - Activities of Daily Living scale; ADCS-CGI-C = Alzheimer's Disease Cooperative Study - Clinical Global Impression of Change; ADAScog-ot = Alzheimer's Disease Assessment Scale – Cognitive Subscale, Orientation; Barthel = Barthel Index for Activities of Daily Living; BARS = Brief Agitation rating Scale; BDT = Block Design Test; BEHAVE-AD-H = Behavioral Pathology in Alzheimer's Disease Rating Scale – category B (hallucinations); BFRT = Benton Facial Recognition Test; BJLO = Benton Judgement of Line Orientation Test; BNT = Boston Naming Test; BPRS = Brief Psychiatric Rating Scale; BTA = Brief Test of Attention; BWVT = Bourdon-Wiersma Vigilance Test; CAF = Clinical Assessment of Fluctuation; CASST = CogState Set Shifting Task; CDRCAS = Cognitive Drug Research Assessment System; CDRCAS-PoA = Cognitive Drug Research Computerized Assessment System - Power of Attention Tests; CFT = Category Fluency Test; CATEG = Category Naming; COWAT = Controlled Word Association Test; CPT = Continuous Performance Task; CGI-C = Clinical Global Impression of Change; CGI-I = Clinical Global Impression-Improvement; CGIC-PD = Clinical Global Impression of Change– Parkinson's Disease scale; CGI-S = Clinical Global Improvement Scale; CIBIC+ = Clinician's Interview Based Impression of Change Plus Caregiver Input; CIRS = Clinical Insight Rating Scale; CMAI = Cohen-Mansfield Agitation Inventory; CMAI-SF = Cohen-Mansfield Agitation Inventory – Short Form; CM-DR-M = modified Cronholm and Molander delayed recall test; CM-IR-M = modified Cronholm and Molander immediate recall test; CSDD = Cornell Scale for Depression in Dementia; CS-SRT = CogState Simple Reaction Time; CS-CRT = CogState Choice Reaction Time; DAD = Disability Assessment for Dementia; D-KEFS-VFT = Delis–Kaplan Executive Function System Verbal Fluency Test; DOT = Digit Ordering Test; DSST = Digit Symbol Substitution Task; DT = computerised detection task (reflexive attention); DTVMI = Developmental Test of Visual-motor Integration; E-BEHAVE-AD = Empirical Behavioral Pathology in Alzheimer's Disease scale; ESS = Epworth Sleepiness Scale; ET = essential tremor; FAB = Frontal Assessment Battery; FLD = frontal lobe dementia; FT = Measurement of finger tapping times; GSD = Geriatric Depression Scale; HARS = Hamilton Anxiety Rating Scale; H&Y = Hoehn and Yahr scale; HRS-D = Hamilton Rating Scale for Depression- 17 items; HVLT-R = Hopkins Verbal Learning Test-Revised; IADL = Instrumental Activities of Daily Living; IRLSS = International Restless Leg Syndrome Scale; Katz-ADL = Katz Index of Activity of Daily Living; Kim = Modified Kim's Test; LMT = Logical Memory Test; MADRS = Montgomery Asberg Depression Rating Scale; MDD = major depressive disorder; MDRS = Mattis Dementia Scale; MDRS-2 = Dementia Rating Scale – 2; MMSE = Mini-Mental State Examination; mMMSE = Modified Mini-Mental State Examination; MST = motor speed test; MWT = Maintenance of Wakefulness Test; NABDF = Nursing Assistant Behavioral Detection Form; NART = National Adult Reading Test;

NINCDS/ADRDA = National Institute of Neurological and Communicative Disorders and Stroke/Alzheimer's Disease and Related Disorders Association; NOS = not otherwise specified; NPI = Neuropsychiatric Inventory; NPI-NH = Neuropsychiatric Inventory – Nursing Home; NRS = Neurobehavioral Rating Scale; PSQI = Pittsburgh Sleep Quality Index; PVT = computerised psychomotor vigilance task (sustained attention); QoL = quality of life; RBD = REM sleep behavior disorder; RMDSD = Rochester Movement Disorders Scale for Dementia; RO-DR = Rey-Osterrieth-delayed recall; RO-IR = Rey-Osterrieth-immediate recall; RO-P = Rey-Osterrieth-picture; QTC = a quick test of cognitive speed; SRT = Selective Reminding Test; RSS = Relative Stress Scale; RSSE = Rating Scale for Side Effects; RT = Reaction Time; SAS = Simpson- Angus Scale; SE = Schwab and England scales; SIB = Severe Impairment Battery; SIP = Sickness Impact Profile; SIT-C = Stroop Interference Test Congruent; SIT-I = Stroop Interference Test Incongruent; SPES = Short Parkinson's Evaluation Scale; TBI = traumatic brain injury; TMT-A = Trail Making Test Part A; TMT-B = Trail Making Test Part B; TPT = Ten Proverb Test; UKU = Udvalg for Kliniske Undersøgelser Side Effect Rating Scale; UPDRS = Unified Parkinson's Disease Rating Scale; UPDRS-III = Unified Parkinson's Disease Rating Scale – Motor subscale; UPDRS-IV = Unified Parkinson's Disease Rating Scale – Complications of Therapy subscale; UPDRS-Thought = Unified Parkinson's disease Rating Scale – Thought Disorder item; VAD = vascular dementia; VAS-alertness = visual analogue scale of alertness; VEPAL = Verbal Paired Associates Learning Test; VFT = Verbal Fluency test; VPTA-FD = Visual Perception Test for Agnosia – Form Discrimination subscale; VPTA-OFI = Visual Perception Test for Agnosia – Overlapping Figure Identification subscale; VRRT-DR = Verbal Recall Test Delayed; VRRT-IR = Verbal Recall Test Immediate; VRRT-recog = Verbal Recognition Test; VRT = Visual Reproduction Test; VST = visuographic speed test; WAIS-DS = Wechsler adult intelligence scale Digit Span Test; WAIS-R-WFp = Wechsler adult intelligence scale-Revised Phonological Word Fluency Test; WAIS-R-WFs = Wechsler adult intelligence scale-Revised Semantic Word Fluency Test; WAIS-DS = Wechsler Adult Intelligence Test – Symbol Digit Modalities subscale; WCST = Wisconsin card sorting task; WMS-R = Wechsler Memory Scale – Revised; WMR-R-A/C = Revised Wechsler Memory Scale – Attention/Concentration subscale; WT = Walk Time Test; ZBI = Zarit Burden Inventory



**FIGURE S2A. Forest plot of global outcomes on the Alzheimer's Disease Cooperative Study - Clinical Global Impression of Change (continuous): donepezil + rivastigmine vs. placebo. Five studies, n = 954**

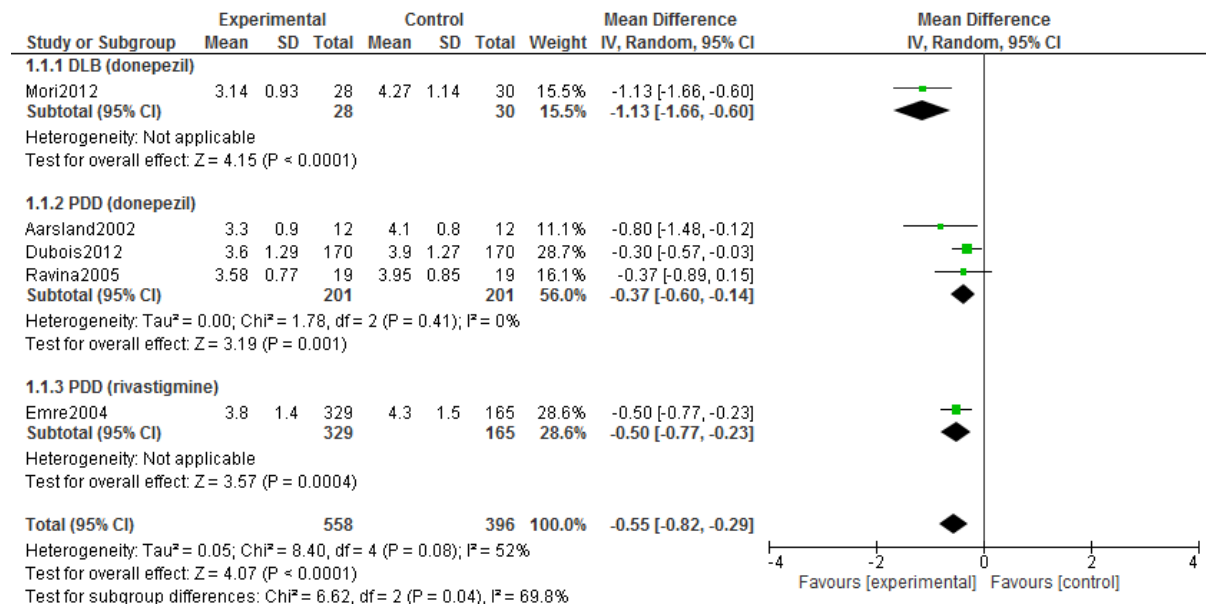

**FIGURE S2B. Forest plot of neuropsychiatric symptoms on the NPI-4: donepezil + rivastigmine vs. placebo. Two studies, n = 167**

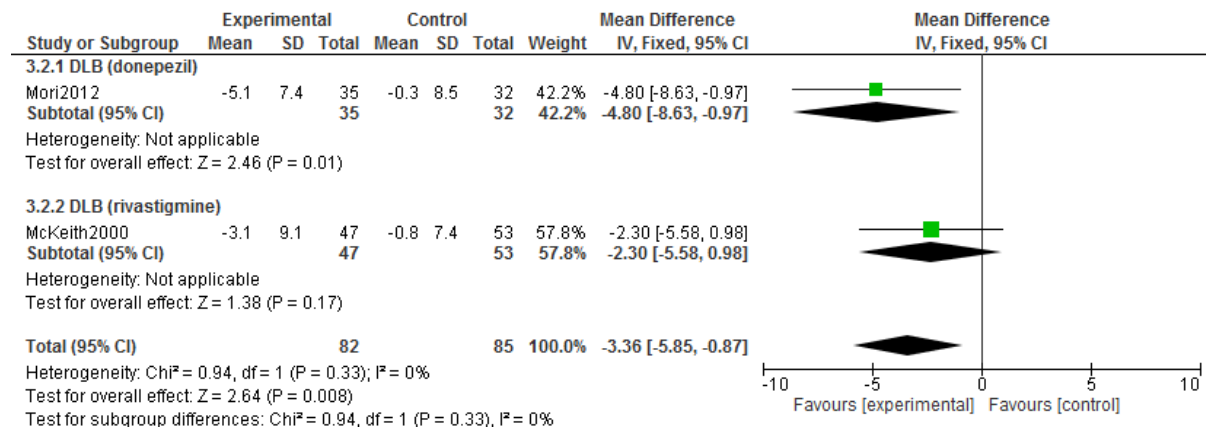

**FIGURE S2C. Forest plot of activities of daily living on the Alzheimer’s Disease Co-operative Study - Activities of Daily Living Inventory, Disability Assessment for Dementia, and Unified Parkinson’s Disease Rating Scale – Activities of Daily Living: donepezil + rivastigmine vs. placebo. Three studies, n = 854**

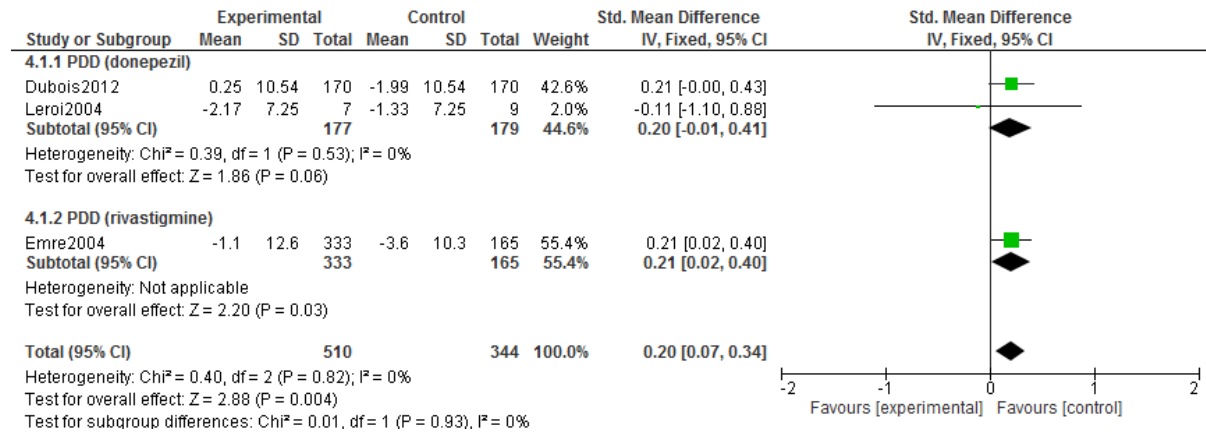

**FIGURE S2D. Forest plot of adverse events: donepezil + rivastigmine vs. placebo. Eight studies, n = 1262**

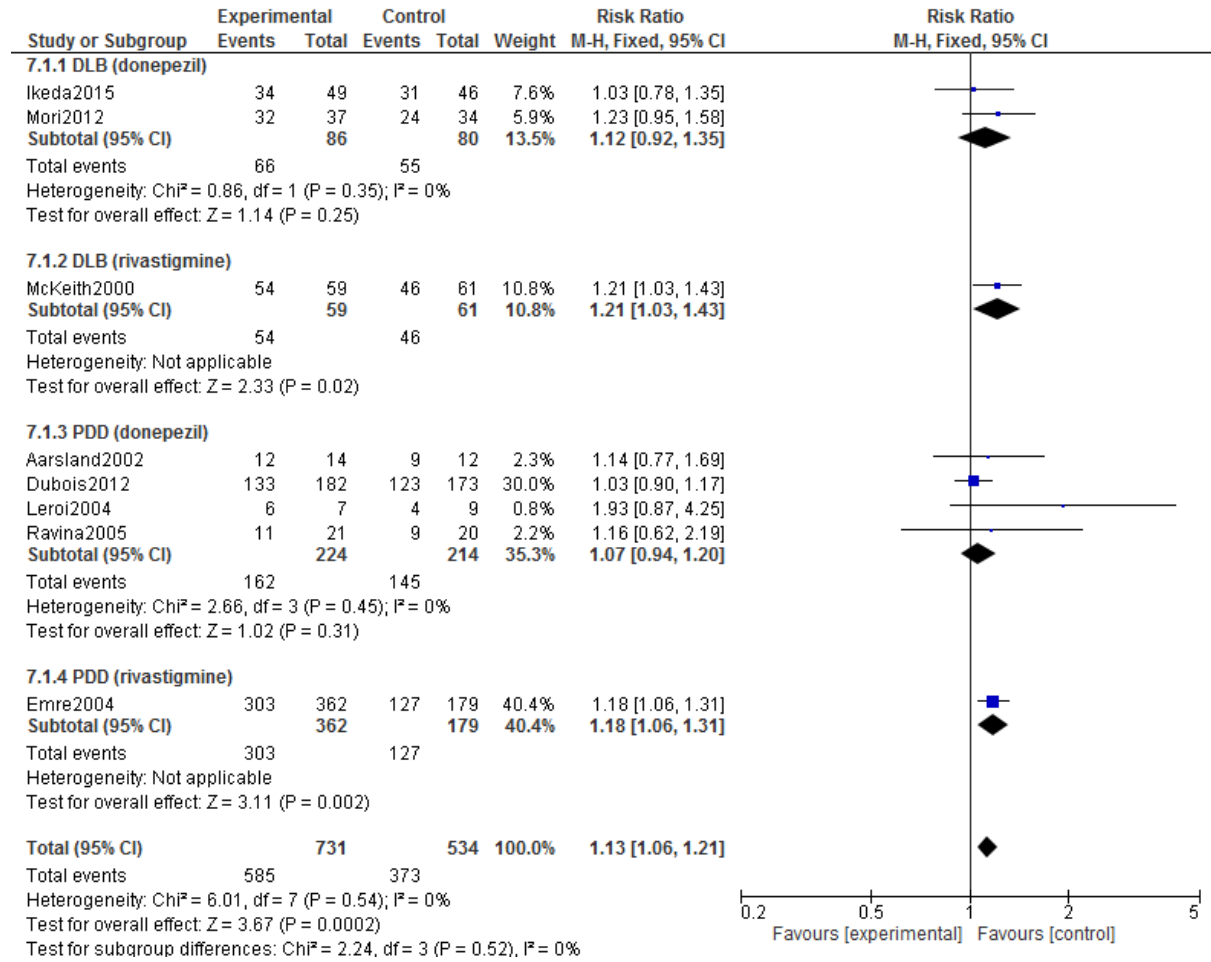

**FIGURE S2E. Forest plot of withdrawals due to any cause: donepezil + rivastigmine vs. placebo. Eight studies, n = 1265**

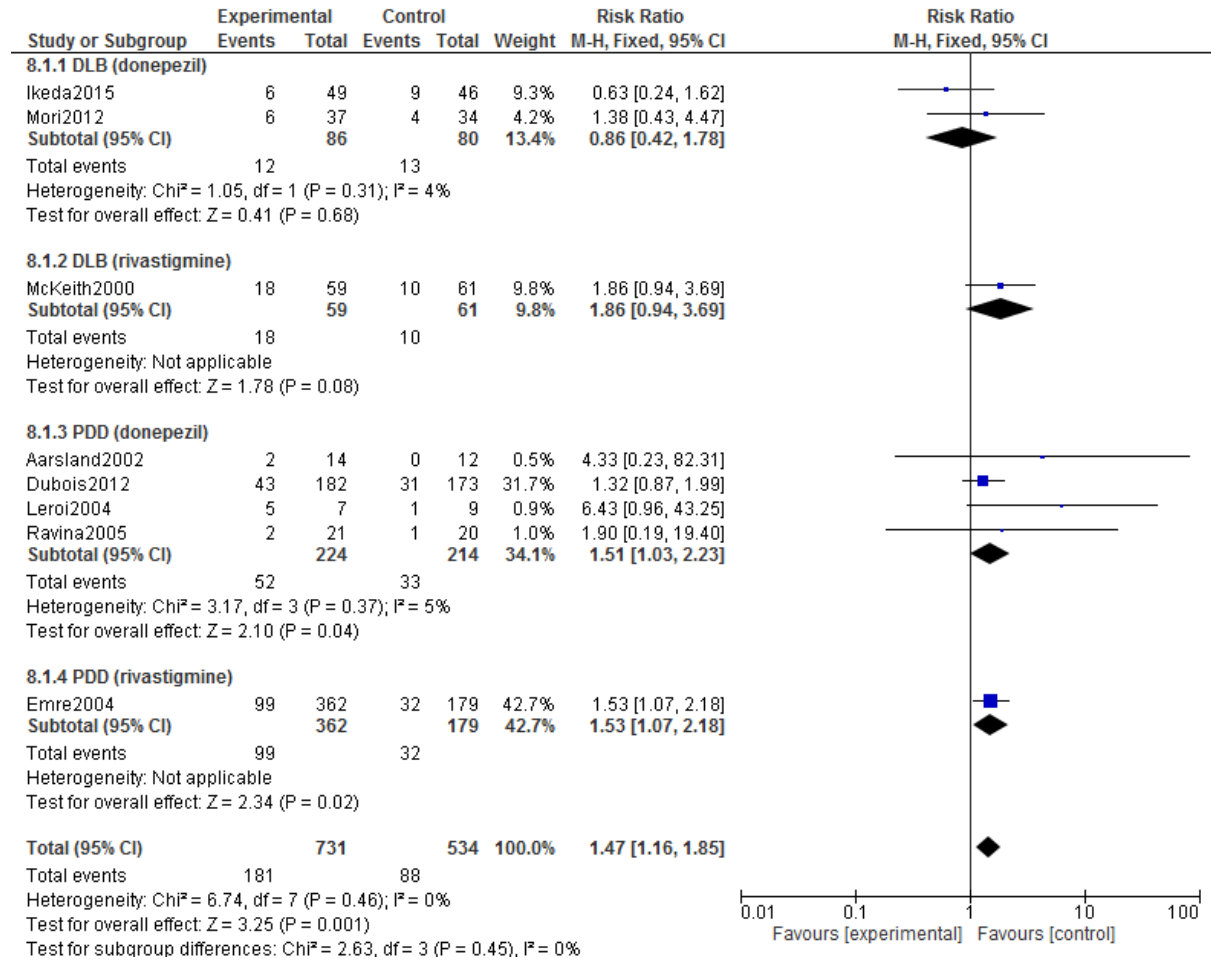

**FIGURE S2F. Forest plot of motor function on the Unified Parkinson's Disease Rating Scale–III: donepezil vs. placebo. Four studies, n = 145**

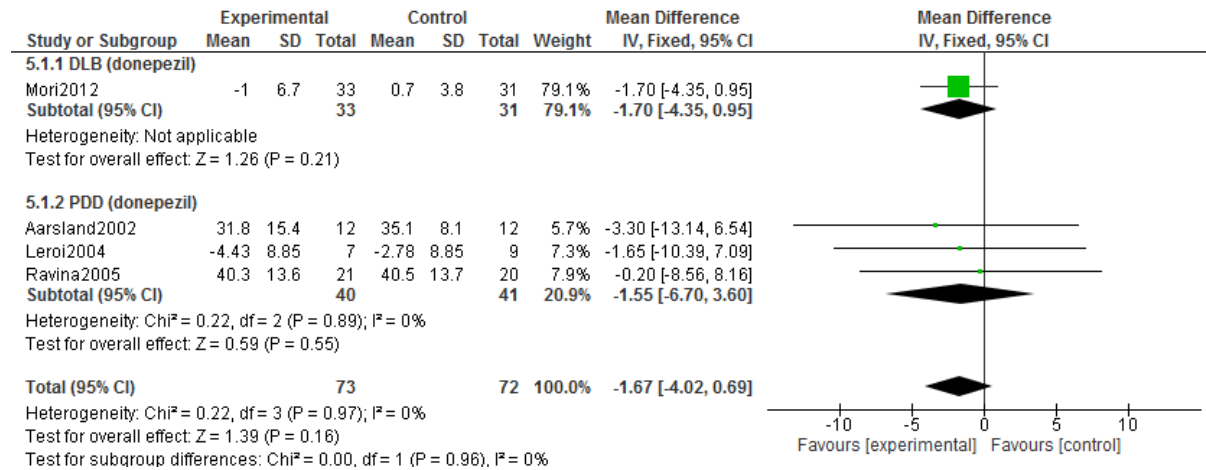

**FIGURE S3A. Forest plot of global outcomes on the Alzheimer's Disease Cooperative Study - Clinical Global Impression of Change (absence of deterioration): memantine vs. placebo. Two studies, n =253**

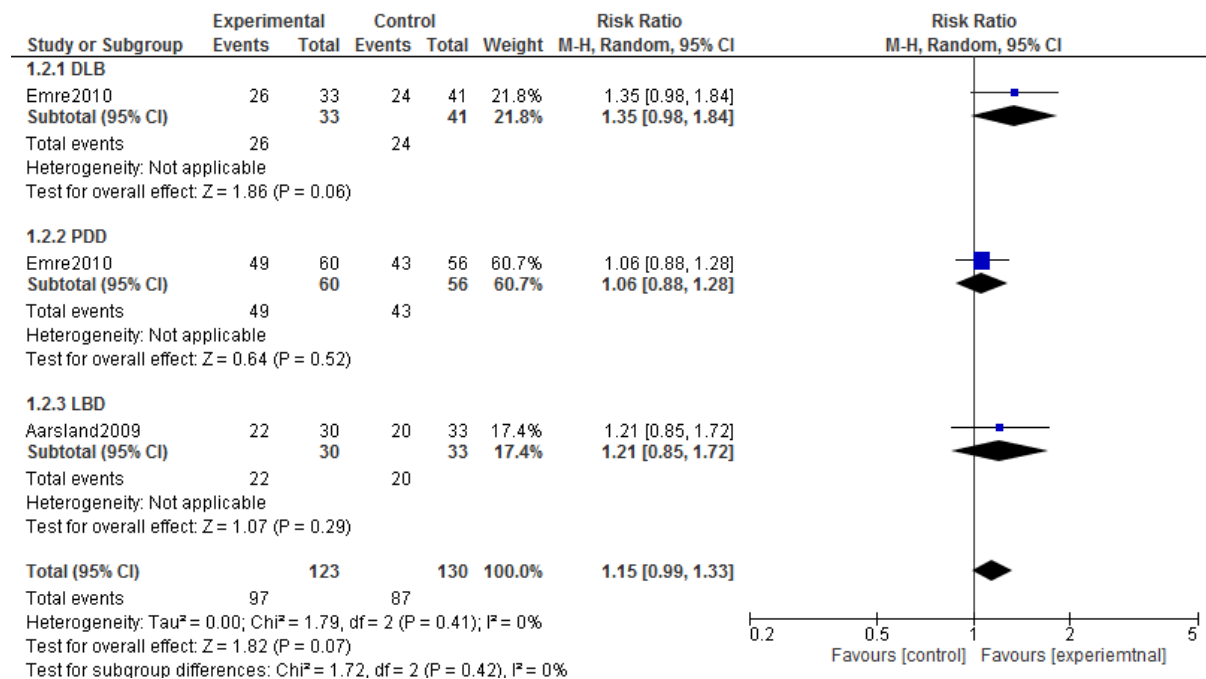

**FIGURE S3B. Forest plot of global outcomes on the Alzheimer's Disease Cooperative Study - Clinical Global Impression of Change (continuous): memantine vs. placebo. Two studies, n = 257**

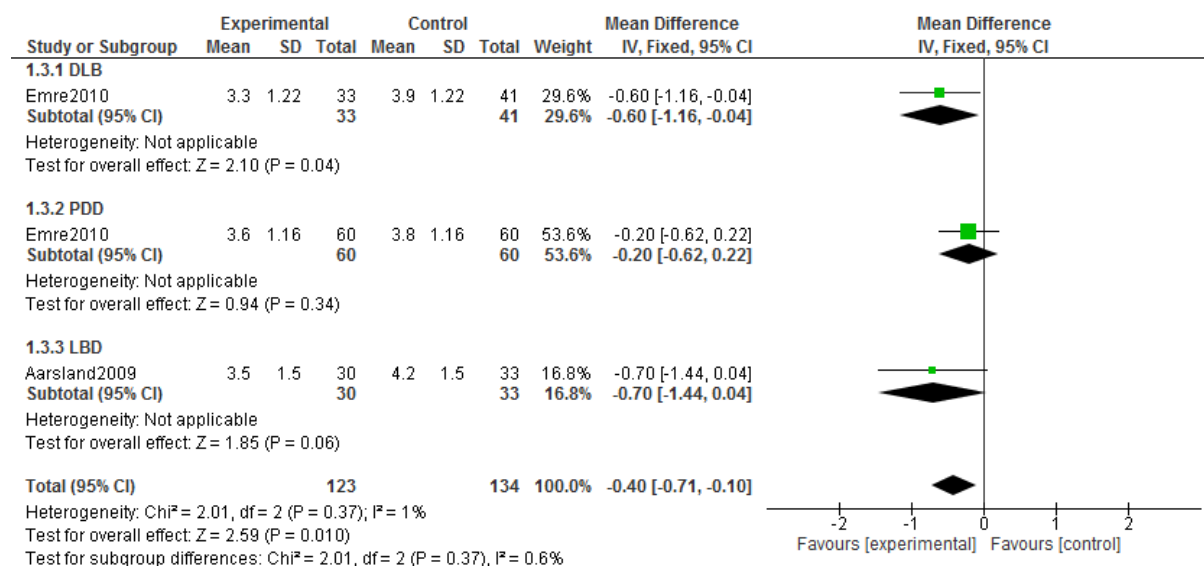

**FIGURE S3C. Forest plot of cognitive functioning on the MMSE: memantine vs. placebo. Two studies, n = 88**

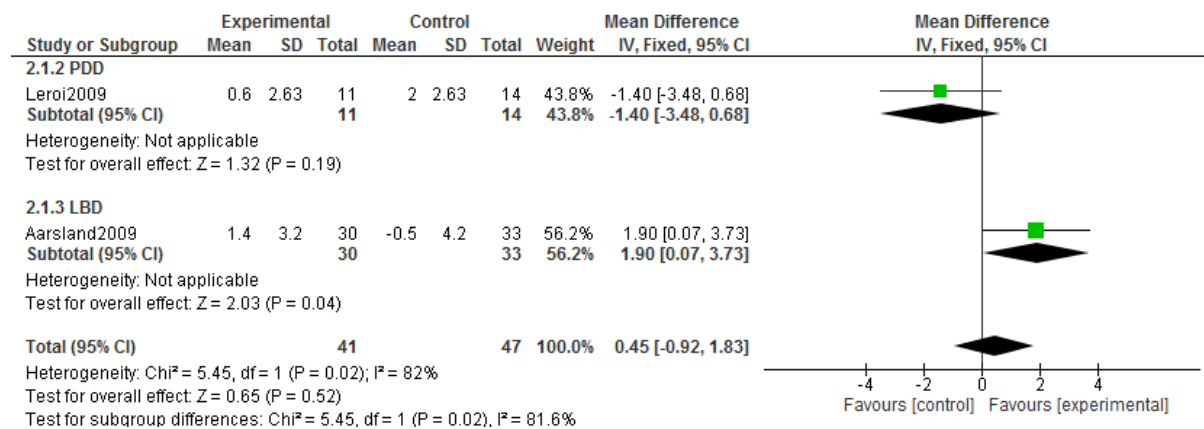

**FIGURE S3D. Forest plot of neuropsychiatric symptoms on the NPI-10: memantine vs. placebo. Three studies, n = 283**

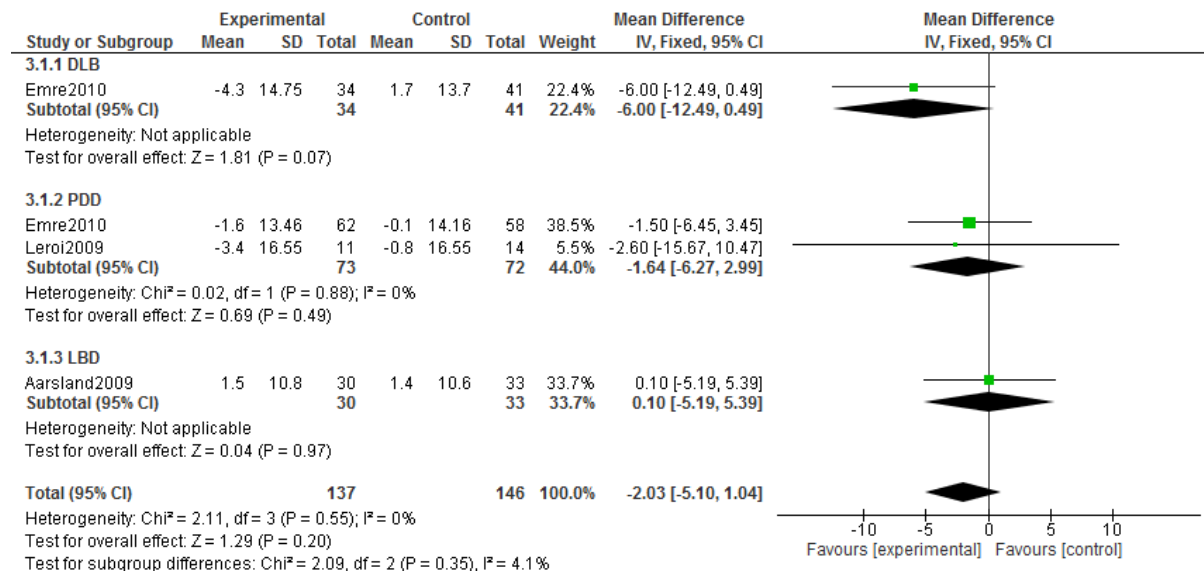

**FIGURE S3E. Forest plot of activities of daily living on the Alzheimer's Disease Co-operative Study - Activities of Daily Living Inventory and Disability Assessment for Dementia: memantine vs. placebo. Two studies, n = 254**

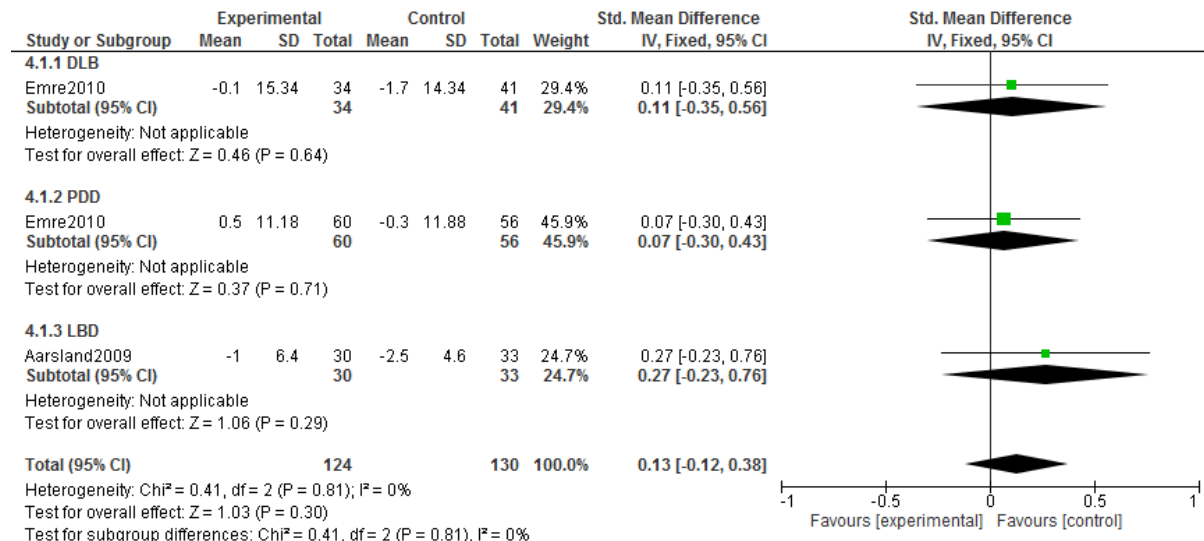

**FIGURE S3F. Forest plot of adverse events: memantine vs. placebo. Three studies, n = 295**

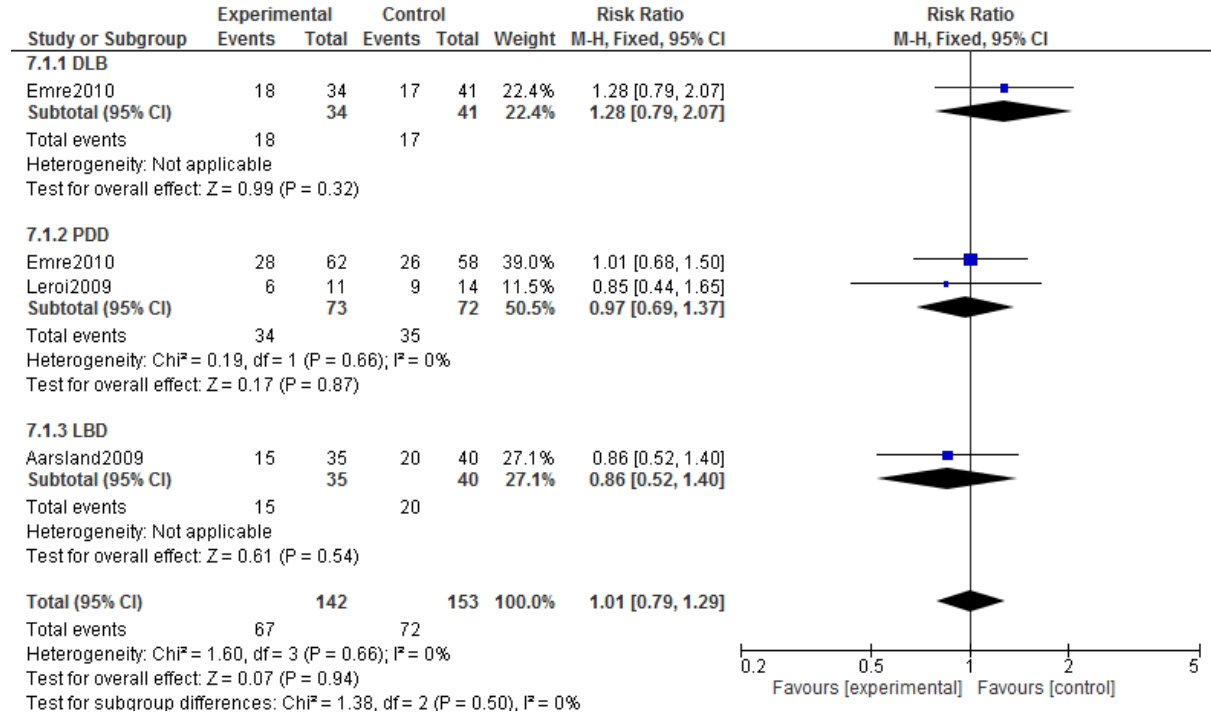



**FIGURE S3G. Forest plot of withdrawals due to any cause: memantine vs. placebo. Three studies, n = 295**

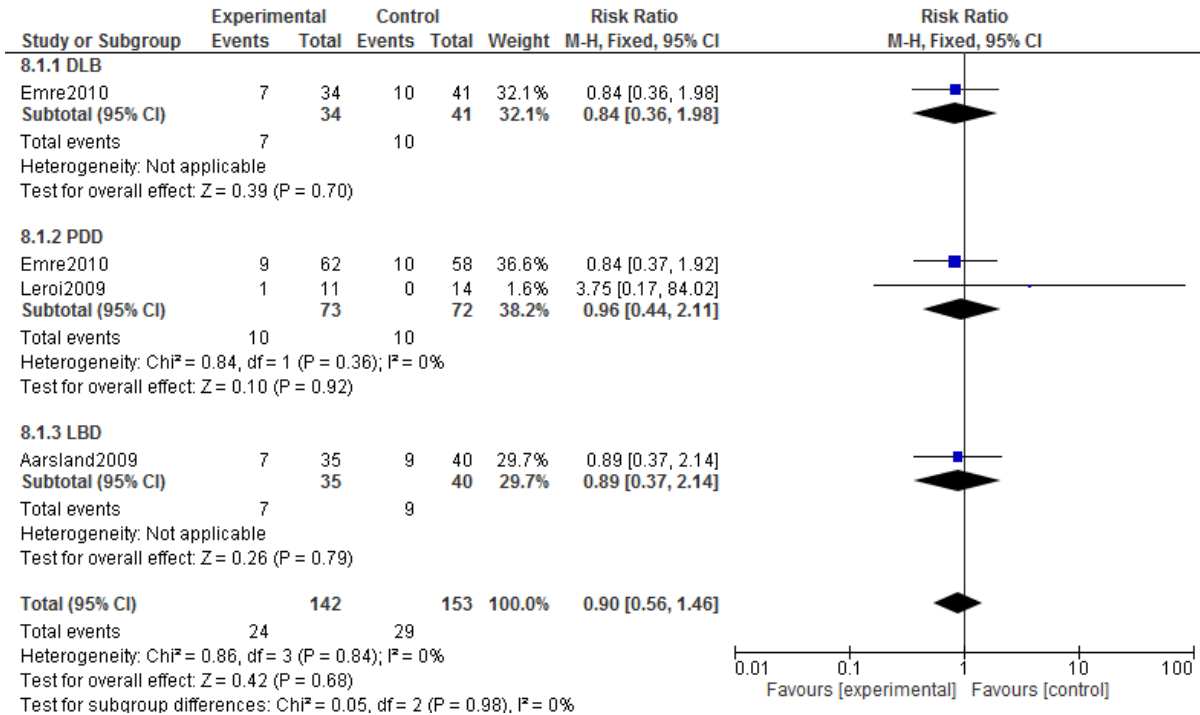

**FIGURE S3H. Forest plot of motor function on the Unified Parkinson's Disease Rating Scale -III: memantine vs. placebo. Three studies, n = 278**

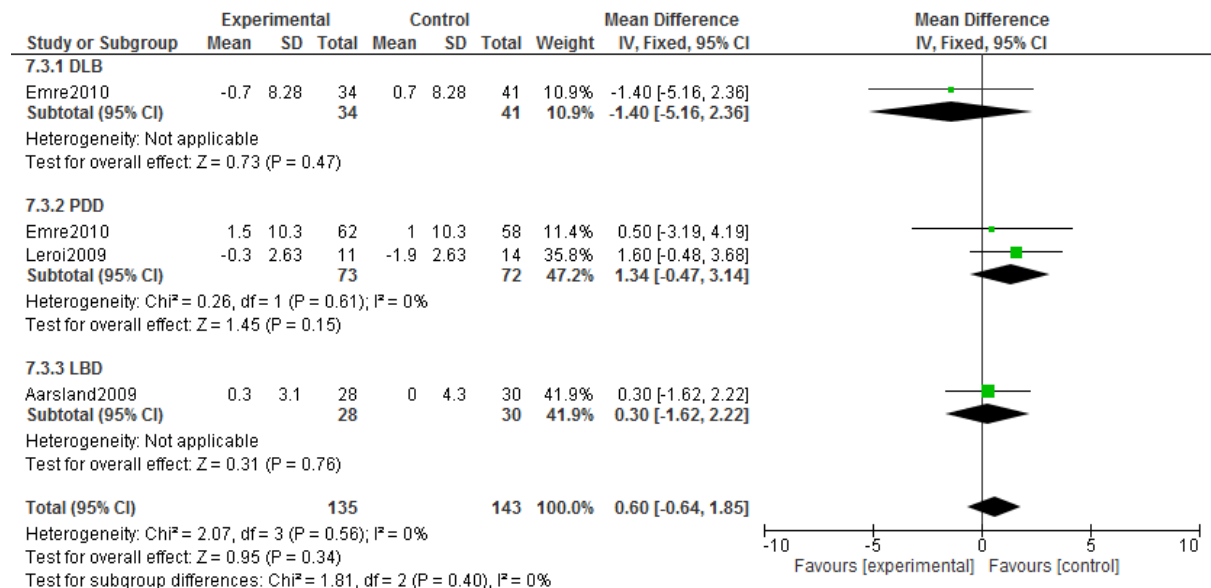

Supplement: appi.ajp.2015.14121582.ds001.pdf [file appi.ajp.2015.14121582.ds001.pdf]
